# Supplementary material for: The Effect of Mindfulness-based Interventions on Stress and Anxiety of Employment in College Students’ China
Source: Research Square preprint supplement (doi:10.21203/rs.3.rs-6985412/v1), 2025-08-13
Supplement: Supplementary file 1 [file 573d8f29cae2e75a9c3291f8.docx]

**Demographic Questions**

**What is your age? [Adapted from –** Junaedi, 2018**]**

- 18-20 years
- 21-23 years
- 24 years and above

**What is your gender? [Adapted from –** Junaedi, 2018**]**

- Male
- Female

**What is your field of education? [Adapted from –** Junaedi, 2018**]**

- Agronomy
- Applied Physics
- Cybersecurity and network engineering

**Reference: [Adapted from]** Junaedi, Decky. (2018). Why people may like invasive species: Investigating biophilia in botanical gardens adjacent to natural forest ecosystems. JOURNAL OF TROPICAL FOREST SCIENCE. 30. 216-223. 10.26525/jtfs2018.30.2.216223.

**Survey Questionnaires**

**IV1: Intrinsic Motivation (IM)**

**IM1:** I teach online because I appreciate this task as interesting

**IM2:** I teach online because online teaching is a real success for me

**IM3:** I teach online because it is a positive challenge for my personal development

**IM4:** I teach online because I like to do this

**IM5:** I teach online because I can easily manage the intellectual effort

**IM6:** I teach online because I manage to identify new aspects of online teaching

**Reference:** Panisoara, I. O., Lazar, I., Panisoara, G., Chirca, R., & Ursu, A. S. (2020). Motivation and continuance intention towards online instruction among teachers during the COVID-19 pandemic: The mediating effect of burnout and technostress. *International Journal of Environmental Research and Public Health*, 17(21), 8002. <https://doi.org/10.3390/ijerph17218002>

**IV2: Autonomy (A)**

**A1:**The job allows me to make my own decisions about how to schedule my work

**A2:** The job allows me to decide on the order in which things are done on the job

**A3:** The job allows me to plan how I do my work

**A4:** The job gives me a chance to use my personal initiative or judgment in carrying out the work

**A5:** The job allows me to make a lot of decisions on my own

**A6:** The job provides me with significant autonomy in making decisions

**Reference: [Adapted from]** Guo, M., Ahmad, N., Adnan, M., Scholz, M., & Naveed, R. T. (2021). The relationship of csr and employee creativity in the hotel sector: The mediating role of job autonomy. Sustainability, 13(18), 10032. <https://doi.org/10.3390/su131810032>

**IV3: Resilience (R)**

**R1:** I tend to bounce back quickly after a hard time of stress

**R2:** I have a hard time making it through stressful events

**R3:** It does not take me long to recover from a stressful event

**R4:** It is hard for me to snap back when something bad happens

**R5:** I come through difficult times with little trouble

**R6:** It tend to take a long time to get over setbacks in my life

**Reference: [Adapted from]** Nwaogu, J. M., & Chan, A. P. (2022). The impact of coping strategies and individual resilience on anxiety and depression among construction supervisors. Buildings, 12(12), 2148. <https://doi.org/10.3390/buildings12122148>

**IV4: Inclusivity**

**I1:** The school helps me to feel good about the future

**I2:** We are encouraged to stand up for what we believe is right

**I3:** I have learnt what democracy means by being at the school

**I4:** I have been involved in making the school a better place

**I5:** I think the teachers are fair when they punish a child

**I6:** If I have a problem in a lesson, a teacher or teaching assistant will help me

**Reference:** Fernández-Archilla, J. A., Álvarez, J. F., Aguilar-Parra, J. M., Trigueros, R., Alonso-López, I. D., & Echeita, G. (2020). Validation of the index for inclusion questionnaire for compulsory secondary education students. *Sustainability*, 12(6), 2169. <https://doi.org/10.3390/su12062169>

**MV:** **Competency**

**C1:** Cultivate a trusting relationship with others in the long run

**C2:** Develop and maintain a personal network of professional contacts

**C3:** Motivate and lead subordinates

**C4:** Apply learned knowledge and skills to real-world situations

**C5:** Retain an extraordinary robust internal drive

**C6:** Keep me up-to-date in my field

**Reference:** [Adapted from] Sakib, M. N., Rabbani, M. R., Hawaldar, I. T., Jabber, M. A., Hossain, J., & Sahabuddin, M. (2022). Entrepreneurial competencies and SMEs’ performance in a developing economy. *Sustainability*, 14(20), 13643. <https://doi.org/10.3390/su142013643>

**MV:** **Psychological Well-Being**

**PW1**: I tend to be influenced by people with strong opinions

**PW2**: In general, I feel I am in charge of the situation in which I live

**PW3**: I think it is important to have new experiences that challenge how you think about yourself and the world

**PW4**: Maintaining close relationships has been difficult and frustrating for me.

**PW5**: I live life one day at a time and don’t really think about the future.

**PW6**: I have confidence in my opinions, even if they are contrary to the general consensus.

**Reference:** Sundaresan, Madhusudanan & Nalini, R.. (2017). Psychological Well-being of Working Women. <https://www.researchgate.net/publication/317953518_Psychological_Well-being_of_Working_Women>

**DV: Stress and Anxiety**

SA1: I found it hard to wind down

SA2: I could not seem to experience any positive feelings at all

SA3: I tended to over-react to situations

SA4: I felt that I was using a lot of nervous energy

SA5: I found it difficult to work up the initiative to do things

SA6: I was intolerant of anything that kept me from getting on with what I was doing

**Reference:** Μangoulia, P., Kanellopoulou, A., Manta, G., Chrysochoou, G., Dimitriou, E., Kalogerakou, T., & Antoniadou, M. (2024, December). Exploring the Levels of Stress, Anxiety, Depression, Resilience, Hope, and Spiritual Well-Being Among Greek Dentistry and Nursing Students in Response to Academic Responsibilities Two Years After the COVID-19 Pandemic. In Healthcare (Vol. 13, No. 1, p. 54). *MDPI*. <https://doi.org/10.3390/healthcare13010054>
